# Supplementary material for: Parkinson's disease, aging and adult neurogenesis: Wnt/β‐catenin signalling as the key to unlock the mystery of endogenous brain repair
Source: PubMed Central journal article supplement (PMC7059166; doi:10.1111/acel.13101), 2020-02-12
Supplement: ACEL-19-e13101-s003.pdf [file ACEL-19-e13101-s003.pdf]

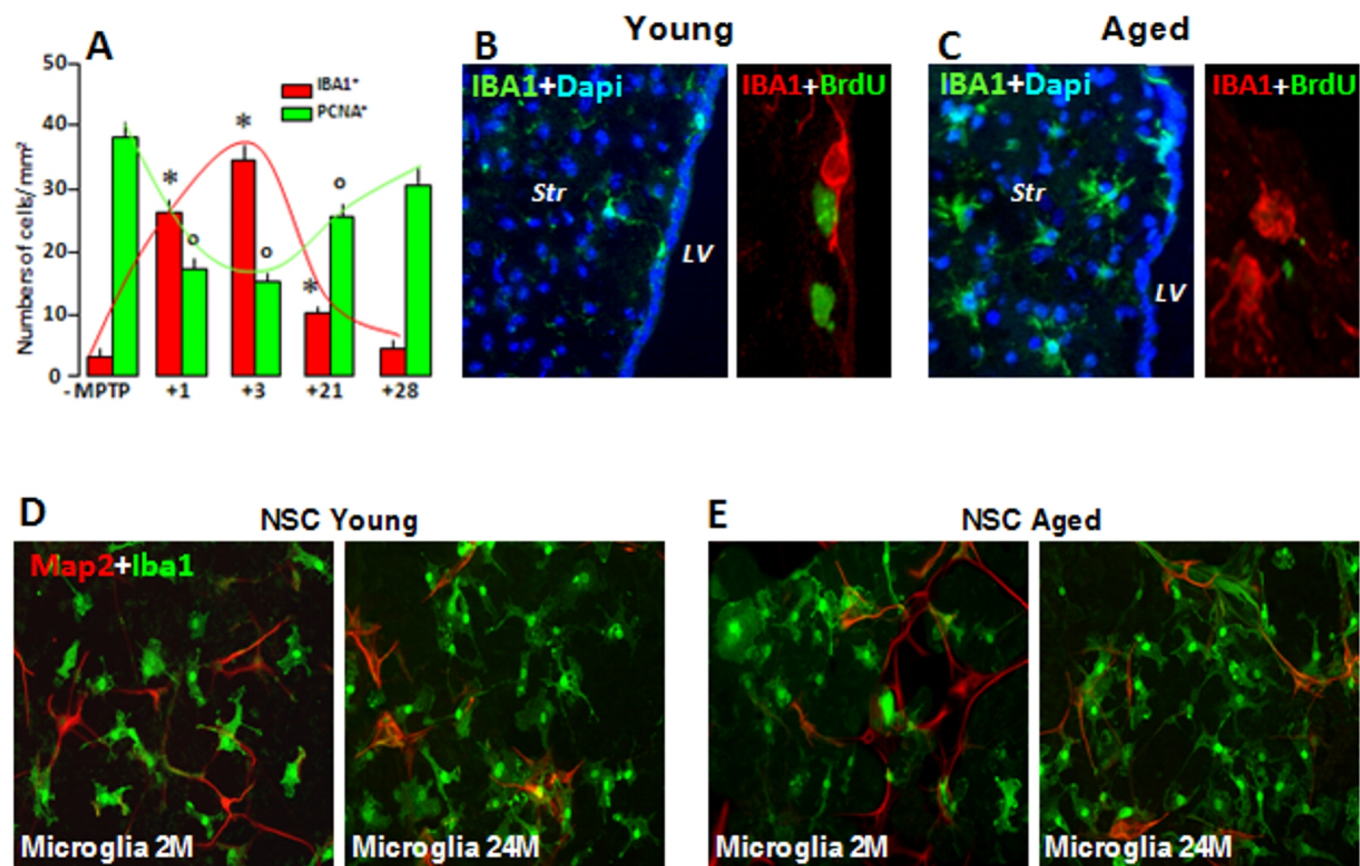

Supplementary Figure 3
